# Supplementary material for: New Biorefinery Approach for the Valorization of Fruit Processing Waste at a Local Scale: Pomegranate Pomace as Case Study
Source: Springer Nature journal article supplement (doi:10.1007/s12649-024-02759-y), 2024-10-15
Supplement: MOESM1 [file 12649_2024_2759_MOESM1_ESM.docx]

**Table S1** Amino acids composition (mg/100 g DW seed) and isoelectric point of pomegranate seeds.

[S1] = Elfalleh, W., Hannachi, H., Guetat, A., Tlili, N., Guasmi, F., Ferchichi, A.,Ying, M.: Storage protein and amino acid contents of Tunisian and Chinese pomegranate (Punica granatum L.) cultivars. Genet. Resour. Crop Evol. 59(6), 999-1014 (2012).

[S2] = Liu, H., Zhang, R., Yao, X., Liu, M., Hu, Z., Fan, B.T.: Prediction of the Isoelectric Point of an Amino Acid Based on GA-PLS and SVMs. J. Chem. Inf. Comput. Sci. 44 1, 161-7 (2004).

| **Amino acid** | **Asp** | **Thr** | **Ser** | **Glu** |
| --- | --- | --- | --- | --- |
| Content (S1) | 918.08 ± 205.71 | 345.50 ± 92.75 | 578.85 ± 145.20 | 2433.91 ± 701.26 |
| Isoeletric point (S2) | 5.43 | 5.60 | 5.70 | 5.65 |
| **Amino acid** | **Gly** | **Ala** | **Cys** | **Val** |
| Content (S1) | 726.20 ± 163.72 | 447.44 ± 109.56 | 389.43 ± 70.79 | 341.28 ± 76.80 |
| Isoeletric point(S2) | 6.06 | 6.11 | 5.15 | 6.02 |
| **Amino acid** | **Ile** | **Leu** | **Tyr** | **Phe** |
| Content (S1) | 205.72 ± 78.12 | 723.49 ± 197.49 | 287.18 ± 83.05 | 380.35 ± 124.12 |
| Isoeletric point(S2) | n.d | 6.04 | 5.63 | 5.76 |
| **Amino acid** | **NH3** | **His** | **Arg** | **Pro** |
| Content (S1) | 166.53 ± 25.85 | 259.94 ± 57.85 | 1183.00 ±352.89 | 439.72 ±64.58 |
| Isoeletric point (S2) | n.d. | 7.64 | 10.76 | 6.30 |

**Table S2** Oil extraction yield after reaction with Maxazyme NNP 1% vol/w d.m.

|  | **Maxazyme NNP** |  | **Control** |  |
| --- | --- | --- | --- | --- |
| **Time (h)** | **Total oil yield %** | **Free-oil ratio %** | **Total oil yield %** | **Free-oil ratio %** |
| 1 | 4.02 | 32.8 | 3.77 | 20.5 |
| 2 | 3.98 | 34.2 | 3.69 | 17.8 |
| 3 | 4.58 | 39.7 | 3.32 | 13.7 |
| 4 | 6.24 | 51.6 | 4.02 | 11.6 |
| 5 | 7.64 | 64.9 | 4.09 | 17.2 |
| 6 | 6.12 | 65.0 | 4.37 | 17.6 |
| 7 | 5.19 | 59.3 | 4.28 | 16.9 |
| 8 | 5.49 | 62.8 | 4.29 | 17.9 |

**Table S3** Oil extraction yield after reaction with Rapidase C80 max 0.5 % vol/w d.m.

|  | **Rapidase C80 max** |  | **Control** |  |
| --- | --- | --- | --- | --- |
| **Time (h)** | **Total oil yield %** | **Free-oil ratio %** | **Total oil yield %** | **Free-oil ratio %** |
| 1 | 2.87 | 18.1 | 3.30 | 38.1 |
| 2 | 3.06 | 24.0 | 3.50 | 30.8 |
| 3 | 7.08 | 65.5 | 4.24 | 35.5 |
| 4 | 5.42 | 46.8 | 4.10 | 36.1 |
| 5 | 5.98 | 42.7 | 4.63 | 29.8 |

**Fig. S1** Emulsion capacity (EC %) (left) and Emulsion stability (ES %) (right) of pomegranate pectin extracted at different pH

**Table S4** Pectin characterization: Emulsion Capacity (EC%), Emulsion Stability (ES %) esterification degree (DE %), pH of 1% w/w pectin solution for each pH of extraction. Comparison between the extraction methods: thermal treatment and enzymatic reaction followed by thermal treatment.

| **Thermal treatment** | **Extraction pH** |  |  |  |
| --- | --- | --- | --- | --- |
|  | **pH 3** | **pH 4** | **pH 5** | **pH 6** |
| Pectin yield % | 10.5 | 7.4 | 7.0 | 7.5 |
| EC % | 8.34 | n.d. | n.d. | n.d. |
| ES % | 3.34 | n.d. | n.d. | n.d. |
| **Enzyme +**  **thermal treatment** | **Extraction pH** |  |  |  |
|  | **pH 3** | **pH 4** | **pH 5** | **pH 6** |
| Pectin yield % | 10.5 | 8.40 | 10.2 | 11.9 |
| EC % | 50.0 | 45.8 | 37.5 | 33.3 |
| ES % | 36.4 | 33.3 | 25.0 | 20.8 |
| DE % | 75.0 | 75.6 | 86.0 | 74.0 |
| pH | 4.10 | 4.20 | 5.20 | 4.90 |

**Table S5** Emulsion Capacity (EC %) and Emulsion stability (ES%) of pomegranate pectin for pectin concentration (w/w) and ethanol volume (EV).

| **Pectin 1% w/w** | **Ethanol Volume** |  |  |
| --- | --- | --- | --- |
|  | **0** | **1** | **2** |
| EC % | 50.0 | 50.0 | 54.2 |
| ES % | 20.0 | 36.7 | 41.7 |
| **Pectin 2% w/w** | **Ethanol Volume** |  |  |
|  | **0** | **1** | **2** |
| EC % | n.d. | 58.3 | 75.0 |
| ES % | n.d. | 45.0 | 61.7 |

**Table S6** Reducing sugars (RS), on pomegranate exocarp (PE) hydrolysate from combined reactions with Rapidase C80max and Cellulase.

| **PE Hydrolysate from combined reactions** | | | |
| --- | --- | --- | --- |
|  | **Control** | **after Rapidase C80 max** | **after Cellulase** |
| RS (mg/mL) | 28.5 ± 0.3 | 34.2 ± 2.4 | 33.8 ± 0.5 |
